# Supplementary material for: Mean squared displacement from fluorescence correlation spectroscopy
Source: Royal Society of Chemistry journal article supplement (doi:10.1039/c6sm00296j), 2016-01-01
Supplement: c6sm00296j1.pdf [file c6sm00296j1.pdf]

## Electronic supplemental material to the article: Mean Squared Displacement from Fluorescence Correlation Spectroscopy

Jakub Kubeka, Filip Uhlík, and Peter Koovan\*  
*Department of Physical and Macromolecular Chemistry, Faculty of Science,  
 Charles University in Prague, Hlavova 8, 128 00 Praha 2, Czech Republic*  
 (Dated: January 29, 2016)

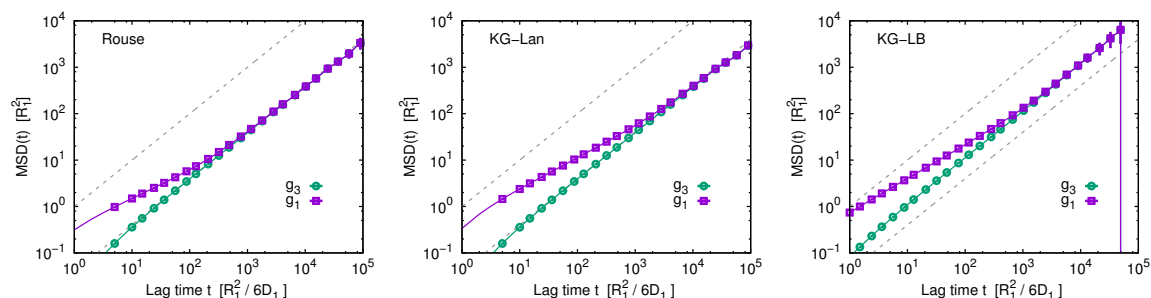

FIG. 1.  $MSD(t)$  for the Rouse model (Rouse), Kremer-Grest model in the Langevin thermostat (KG-Lan) and Kremer-Grest model with Lattice-Boltzmann hydrodynamics (KG-LB). For comparison, we show the  $MSD(t)$  of the centre of mass of the chain ( $g_3(t)$ ) and of a single monomer ( $g_1(t)$ ) averaged over all monomers of the chain.

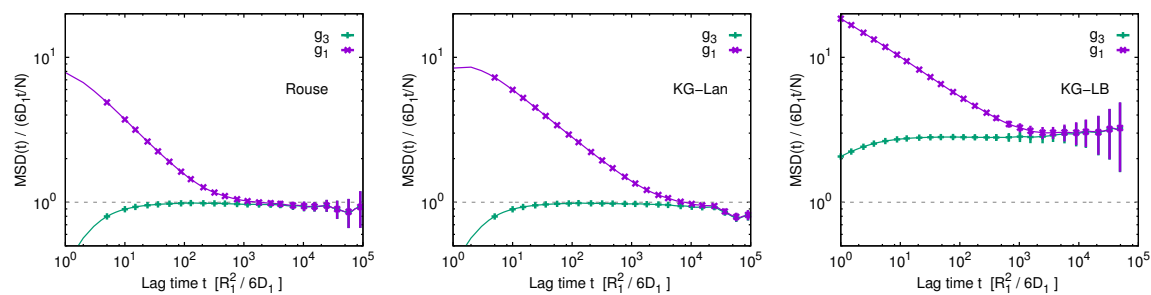

FIG. 2. Analogue of Fig. 1, showing the scaled mean squared displacement  $MSD(t)/6D_1 t$ .

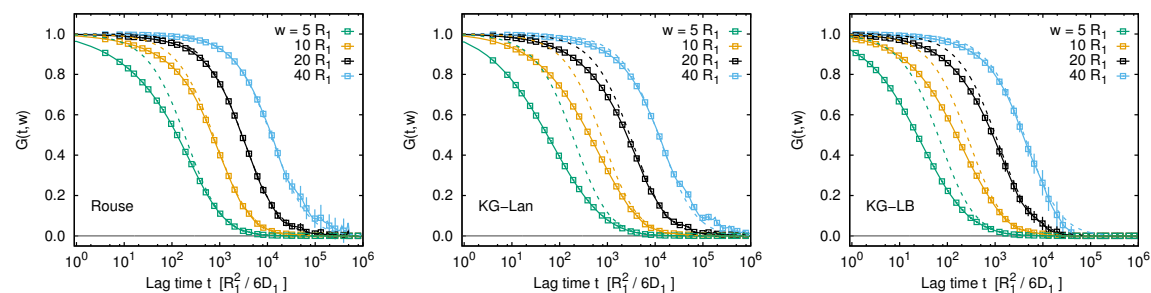

FIG. 3. The FCS correlation functions,  $G(t, w)$  for all three considered models. For comparison,  $G(t, w)$  of a single particle performing normal diffusion with diffusion coefficient  $D_N^R$  are shown as dashed lines.

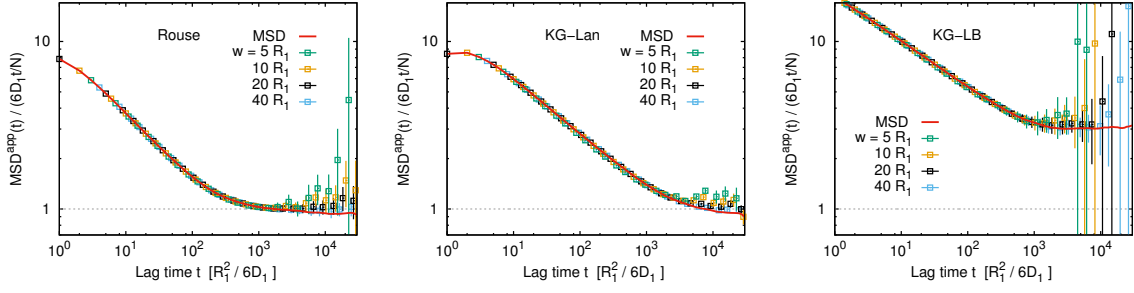

FIG. 4. The scaled apparent mean squared displacement,  $\text{MSD}^{\text{app}}(t, w)$ , obtained from  $G(t, w)$  for all three considered models. For comparison, the true mean squared displacement,  $\text{MSD}(t)$  is shown as well.

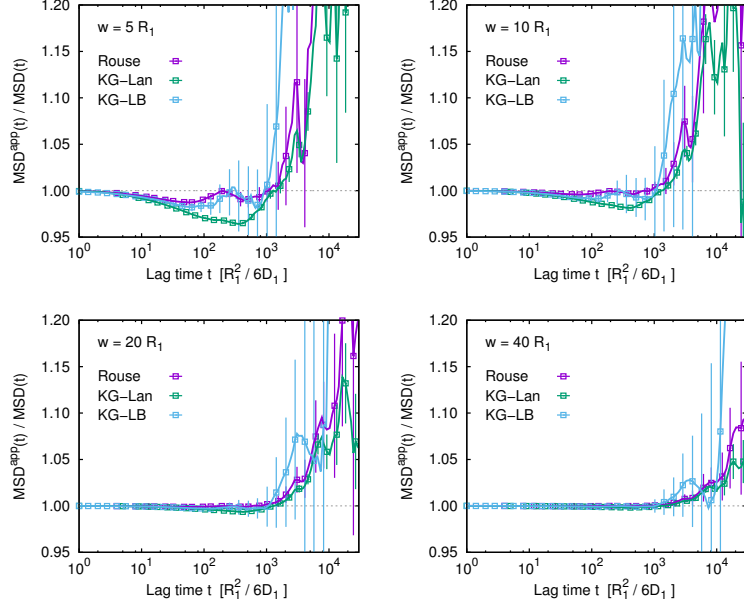

FIG. 5. The ratio of the apparent mean squared displacement, and the true one for various values of  $w$ , for all three considered models.

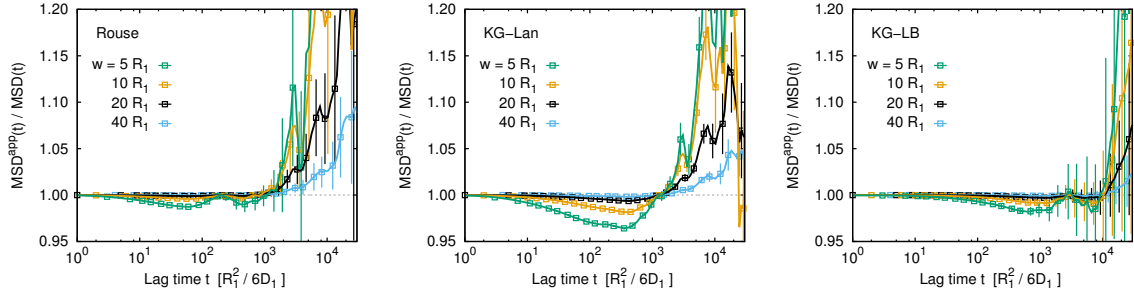

FIG. 6. The ratio of the apparent mean squared displacement, and the true one for various values of  $w$ , for all three considered models.

\* peter.kosovan@natur.cuni.cz
